# Supplementary material for: Growth of CaxCoO2 Thin Films by A Two-Stage Phase Transformation from CaO–CoO Thin Films Deposited by Rf-Magnetron Reactive Cosputtering
Source: MDPI journal article supplement (doi:10.3390/nano9030443), 2019-03-15
Supplement: s1 [file s1]

### Supplementary information

Figure S1 shows  $\theta - 2\theta$  XRD scan for the as-deposited films Ca:Co = 0.25, Ca:Co = 0.35 and Ca:Co = 0.45. XRD scans of all the as-deposited films are similar in appearance, albeit with varying CaO:CoO peak intensity ratios. It is evident from the XRD analyses that as deposited film consists of CaO and CoO phases.

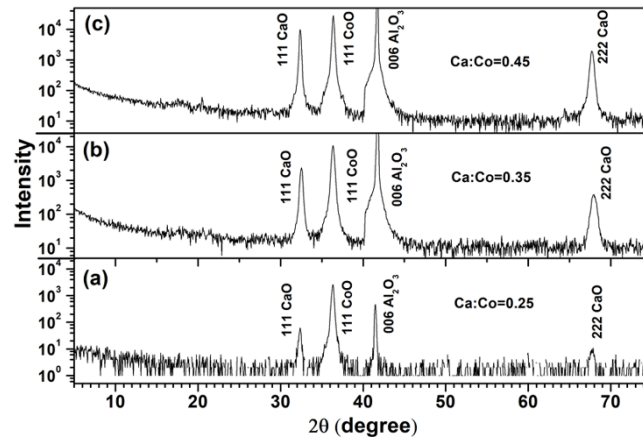

**Figure S1.**  $\theta - 2\theta$  XRD patterns of as-deposited CaO–CoO film (a) Ca:Co = 0.25, (b) Ca:Co = 0.35, (c) Ca:Co = 0.45.
